# Supplementary material for: Hepatic DKK1-driven steatosis is CD36 dependent
Source: Life Sci Alliance. 2022 Nov 21;6(1):e202201665. doi: 10.26508/lsa.202201665 (PMC9679335; doi:10.26508/lsa.202201665)
Supplement: Supplementary file 1 [file LSA-2022-01665_SdataF1.xls]

## Sheet: Figure 1
Figure 1D										Figure 1C				Figure 1G
											DKK1--gene expression
											Chow	HFD
											1.405	2.82636
											0.594446	2.00453		DKK1
DKK1											0.869396	2.33018
											1.13116	2.34735
										Figure 1E
											DKK1/Tubulin
											Chow	HFD
											0.86	0.98
											0.81	1.21
β-Tubulin											0.68	1.32
											0.63	1.37		b-Tubulin
										Figure 1F	serum DKK1
Figure 1H											Chow	HFD
											6006	6893.1
											6117	5017.7
											5259	9055
											6054	6599.4
											4560	5947.7
DKK1											4009	9682
											3525	6362.55
											5806	6882.15
											6016	6964.3
											4905	6942.35
											4865	5253.95
											5223	8300.1
											4254	6090.6
											5156	6561.6
											2069	7140.4
β-Tubulin												8398.95
												5346.9
