# Supplementary material for: Hepatic DKK1-driven steatosis is CD36 dependent
Source: Life Sci Alliance. 2022 Nov 21;6(1):e202201665. doi: 10.26508/lsa.202201665 (PMC9679335; doi:10.26508/lsa.202201665)
Supplement: Supplementary file 4 [file LSA-2022-01665_SdataFS2.xls]

## Sheet: Figure S2
Figure S2C											Figure S2D
			HepG2												AML12
DKK1											DKK1
β-Tubulin
											β-Actin
	Figure S2H						Figure S2G
		AML12					HepG2
												Figure S2K
CD36
													DKK1
β-Tubulin
			Figure S2J
													β-Tubulin
				DKK1
				β-Tubulin
