# Supplementary material for: Hepatic DKK1-driven steatosis is CD36 dependent
Source: Life Sci Alliance. 2022 Nov 21;6(1):e202201665. doi: 10.26508/lsa.202201665 (PMC9679335; doi:10.26508/lsa.202201665)
Supplement: Supplementary file 7 [file LSA-2022-01665_SdataF5.xls]

## Sheet: Figure 5 
Figure 5A												Figure 5B											Figure 5E
																								HepG2
																								BSA			BSA-r-mDKK1			FFA			FFA-r-mDKK1
																							WT	0.0833	0.0994	0.0887	0.1138	0.1181	0.1181	0.3069	0.3426	0.3069	0.4592	0.4567	0.4616
																							CD36-KO	0.0629	0.074	0.085	0.0559	0.0589	0.0737	0.292	0.3269	0.292	0.3039	0.3458	0.3039
SREBP2												SREBP2
																							Figure 5F
																								AML12
																								BSA			BSA-r-hDKK1			FFA			FFA-r-hDKK1
																							WT	0.078	0.082	0.075	0.061	0.069	0.104	0.187	0.179	0.189	0.198	0.221	0.221
																							CD36-KO	0.06	0.06	0.062	0.073	0.071	0.075	0.18	0.187	0.18	0.171	0.171	0.187
CPT1α												CPT1α											Figure 5G
																								OE-GFP			OE-DKK1
																							NC-Promter	1.8	1.88	1.96	1.72	1.75	1.75
																							CD36-Promter	1.54	1.61	1.57	4.13	4.21	4.33
																							Figure 5H
ACOX1
												ACOX1												p-ERK
																								T-ERK
SCD1
												ACC
																								GAPDH
ACC
																								p-PPARg
												FAS
																								PPARg
FAS
												CD36
																								Lamin B
CD36
												β-Tubulin
β-Tubulin
